# Lineage<sup>-</sup>CD34<sup>+</sup>CD31<sup>+</sup> Cells That Appear in Association with Severe Burn Injury Are Inhibitory on the Production of Antimicrobial Peptides by Epidermal Keratinocytes

Shohei Yoshida<sup>1</sup>, Jong O. Lee<sup>2</sup>, Kiwamu Nakamura<sup>1</sup>, Sumihiro Suzuki<sup>3</sup>, David N. Hendon<sup>2</sup>, Makiko Kobayashi<sup>1,2</sup>, Fujio Suzuki<sup>1,2\*</sup>

**1** Department of Internal Medicine, The University of Texas Medical Branch, Galveston, Texas, United States of America, **2** Shriners Hospital for Children, Galveston, Texas, United States of America, **3** Department of Biostatistics, University of North Texas Health Science Center, Fort Worth, Texas, United States of America

## Abstract

Antimicrobial peptides are major host defense effectors against *Pseudomonas aeruginosa* skin infections. Due to the lack of such peptide production, severely burned hosts are greatly susceptible to *P. aeruginosa* burn wound infection.  $\beta$ -Defensin (HBD) production by normal human epidermal keratinocytes (NHEK) was inhibited by lineage<sup>-</sup>CD34<sup>+</sup> cells isolated from peripheral blood of severely burned patients. Lineage<sup>-</sup>CD34<sup>+</sup> cells obtained from severely burned patients were characterized as CD31<sup>+</sup>, while healthy donor lineage<sup>-</sup>CD34<sup>+</sup> cells were shown to be CD31<sup>-</sup> cells. Lineage<sup>-</sup>CD34<sup>+</sup>CD31<sup>-</sup> cells did not show any inhibitory activities on HBD-1 production by NHEK. CCL2 and IL-10 released from lineage<sup>-</sup>CD34<sup>+</sup>CD31<sup>+</sup> cells were shown to be inhibitory on the peptide production by NHEK, while these soluble factors were not produced by lineage<sup>-</sup>CD34<sup>+</sup>CD31<sup>-</sup> cells. After treatment with a mixture of mAbs for CCL2 and IL-10, the culture fluids of lineage<sup>-</sup>CD34<sup>+</sup>CD31<sup>+</sup> cells did not show any inhibitory activities on HBD-1 production by NHEK. Lineage<sup>-</sup>CD34<sup>+</sup>CD31<sup>+</sup> cells that appear in association with burn injuries play a role on the inhibition of antimicrobial peptide production by skin keratinocytes through the production of CCL2 and IL-10.

**Citation:** Yoshida S, Lee JO, Nakamura K, Suzuki S, Hendon DN, et al. (2014) Lineage<sup>-</sup>CD34<sup>+</sup>CD31<sup>+</sup> Cells That Appear in Association with Severe Burn Injury Are Inhibitory on the Production of Antimicrobial Peptides by Epidermal Keratinocytes. PLoS ONE 9(2): e82926. doi:10.1371/journal.pone.0082926

**Editor:** Charles C. Caldwell, University of Cincinnati, United States of America

**Received:** May 2, 2013; **Accepted:** October 29, 2013; **Published:** February 3, 2014

**Copyright:** © 2014 Yoshida et al. This is an open-access article distributed under the terms of the Creative Commons Attribution License, which permits unrestricted use, distribution, and reproduction in any medium, provided the original author and source are credited.

**Funding:** This work was supported by the Shriners Hospitals for Children Grant #85110. The funders had no role in study design, data collection and analysis, decision to publish, or preparation of the manuscript.

**Competing Interests:** The authors have declared that no competing interests exist.

\* E-mail: fsuzuki@utmb.edu

## Introduction

Burn patients are particularly susceptible to various infections [1–3]. In these patients, burn wound infections can easily escalate into sepsis [4]. *Pseudomonas aeruginosa* is a pathogen most frequently isolated from severely burned patients, and a major source for life-threatening infections in these patients [5]. Normally, topical antimicrobials are effective for controlling the colonization and multiplication of the pathogen on the surface of burn wounds [4]; however, due to the burn-associated defects of a host's antimicrobial innate immunity, the small numbers of *P. aeruginosa* that elude treatment are sufficient to spread systemically [6]. Skin is recognized as a physiological barrier against microorganisms and functions as a host's defense mechanism against invading pathogens by producing antimicrobial peptides [7–9]. Antimicrobial peptides produced by skin keratinocytes kill the pathogen by adhering to and punching a hole in the fatty cell membranes of the bacteria and chemoattract various immunocompetent cells to the infection sites [7–9]. The lack of antimicrobial peptides in the skin allows surface growth and subsequent spreading of the pathogens throughout the body [10–13]. Some antimicrobial peptides are synthesized naturally, whereas some are produced after exposure to microbes [7–9].  $\beta$ -Defensins, mainly produced by epidermal keratinocytes, are one of the major families of skin antimicrobial peptides. Gene-defect experimental models and engineered

epidermis have explored the importance of  $\beta$ -defensins in controlling skin infections [10–13]. However, the lack of  $\beta$ -defensins in burned skin and in burn blister fluids has been described [14,15]. In our previous studies, the homogenates of tissues surrounding the burn area did not contain sufficient amounts of antimicrobial peptides [16]. Furthermore, normal mice treated with anti-murine skin antimicrobial peptide IgG did not resist skin infection with 100 CFU/mouse of *P. aeruginosa* [17]. These results indicate that the lack of antimicrobial peptide production in tissues surrounding the burn sites is a key factor for the development of sepsis caused by *P. aeruginosa* burn wound infections.

In previous murine studies [16,18], we have demonstrated that cells isolated from tissues surrounding the burn sites were inhibitory on the production of antimicrobial peptides by epidermal keratinocytes, and that these inhibitor cells were characterized as Gr-1<sup>+</sup>CD11b<sup>+</sup>CD34<sup>+</sup>CD40<sup>+</sup> cells [16]. Similar to the murine studies, we recently isolated CD34<sup>+</sup> cells from a hematopoietic lineage cell-depleted preparation (lineage<sup>-</sup>CD34<sup>+</sup> cells) of peripheral blood cells from severely burned patients; these cells were shown to be inhibitory on the production of antimicrobial peptides by normal human epidermal keratinocytes (NHEK). In other studies, the suppressor cell activity of bone-marrow-derived lineage<sup>-</sup>CD34<sup>+</sup> cells against T cell blastformation has been reported [19]. Also, an increase in the number of

lineage<sup>-</sup>CD34<sup>+</sup> leukemia stem cells in cancer patients has been reported, where these cells are considered to be involved in tumor-associated immunosuppression [20–22]. Therefore, in this paper, burn patient lineage<sup>-</sup>CD34<sup>+</sup> cells were further characterized for their inhibitory functions on the antimicrobial peptide production by NHEK.

In this study, lineage<sup>-</sup>CD34<sup>+</sup> cells isolated from the peripheral blood of severely burned patients were characterized as CD31<sup>+</sup> cells, which are known to be inhibitory on HBD-1 production by NHEK. CCL2 and IL-10 released from burn patient lineage<sup>-</sup>CD34<sup>+</sup>CD31<sup>-</sup> cells were shown to be responsible for their inhibitory activities on the production of HBD-1 by NHEK.

## Materials and Methods

### Ethics statement

The study was approved by the Institutional Review Board of the University of Texas Medical Branch (IRB approved number: 02-018). A written informed consent for blood sampling was obtained from all adult subjects. For blood sampling from children, written parental consent was obtained. Ethical approval was obtained from the Ethical and Scientific Committee of the University of Texas Medical Branch.

### Thermally injured patients

Twenty severely burned patients (14 male, 6 female) admitted to the Shriners Hospitals for Children at Galveston and the University of Texas Medical Branch (UTMB) were enrolled in this study (**Table 1**). All patients had more than a 30% total body surface area (TBSA) burn (average 55.7±18.3%). The youngest and oldest ages were 4 and 54 years old (average 15.2±14.7), respectively. All patients were subjected to a standard treatment regimen [23]. This regimen consisted of fluid resuscitation, topical antimicrobial agents, and aggressive nutrition support based on estimated energy and protein needed.

### Reagents, media, and cells

Human β-defensin-1 (HBD-1) kits were purchased from PeptoTech (Rocky Hill, NJ, USA). HBD-1, murine β-defensin-1 (MBD-1), anti-HBD-1, and anti-MBD-1 antibodies were purchased from Alpha Diagnostic International (San Antonio, TX, USA). Lineage cell depletion kits were purchased from Miltenyi Biotec (Auburn, CA, USA). FITC-conjugated anti-CD34 mAb and PE-conjugated anti-CD31 mAb were purchased from BD Biosciences (Franklin Lakes, NJ, USA) and BioLegend (San Diego, CA, USA), respectively. Recombinant (r) CCL2, rIL-4, rIL-10, and rIL-13 were obtained from PeptoTech. mAbs directed against CCL2, IL-10, and IL-13 were purchased from BioLegend. Adult normal human epidermal keratinocytes (NHEK) were obtained from Lonza (Walkersville, MD, USA) and propagated in a serum-free keratinocyte growth medium (KMG-2, Lonza) at 37°C. NHEK that underwent a second passage with KMG-2 were stored in liquid nitrogen. NHEK grown from the stored cells (the third passage) were used in this study. RPMI-1640 medium supplemented with 10% FBS, 2 mM L-glutamine, and antibiotics (100 U/ml penicillin and 100 µg/ml streptomycin) was used as culture media for lineage<sup>-</sup>CD34<sup>+</sup> cells.

### Preparation of lineage<sup>-</sup>CD34<sup>+</sup> cells

Lineage<sup>-</sup>CD34<sup>+</sup> cells were prepared from peripheral blood mononuclear cells (PBMC) of thermally injured patients and healthy donors. Because the amount of blood specimens from each burn patient was not enough for all assays, we have developed each experiment utilizing available patient blood as

**Table 1.** Burn patients and healthy donors enrolled in this study.

| Patients* (#)       | Sex | Age (y) | TBSA burn (%) | Post burn days |
|---------------------|-----|---------|---------------|----------------|
| 1–7 days post burn  |     |         |               |                |
| 1                   | M   | 29      | 56            | 4              |
| 2                   | M   | 33      | 30            | 4              |
| 3                   | M   | 54      | 38            | 0              |
| 4                   | M   | 5       | 44            | 3              |
| 5                   | M   | 4       | 36            | 3              |
| 6                   | M   | 9       | 75            | 6              |
| 7                   | M   | 8       | 70            | 1              |
| 8                   | M   | 8       | 81            | 1              |
| 9                   | M   | 13      | 65            | 4              |
| 1–4 weeks post burn |     |         |               |                |
| 10                  | M   | 11      | 35            | 14             |
| 11                  | M   | 9       | 75            | 16             |
| 12                  | M   | 10      | 46            | 14             |
| 13                  | F   | 50      | 89            | 24             |
| 14                  | F   | 4       | 40            | 17             |
| 15                  | F   | 8       | 40            | 10             |
| 1–3 years post burn |     |         |               |                |
| 16                  | F   | 9       | 65            | 829            |
| 17                  | M   | 4       | 84            | 448            |
| 18                  | M   | 8       | 44            | 586            |
| 19                  | F   | 12      | 49            | 212            |
| 20                  | M   | 16      | 53            | 697            |
| Healthy donors (#)  |     |         |               |                |
| 1                   | M   | 37      |               |                |
| 2                   | F   | 4       |               |                |
| 3                   | M   | 38      |               |                |
| 4                   | M   | 30      |               |                |
| 5                   | F   | 9       |               |                |

\*All patients were admitted to the Shriners Hospitals for Children at Galveston from February 2008 to July 2011.  
doi:10.1371/journal.pone.0082926.t001

follows: RT-PCR analysis (burn patients #1, #16, #17, #18 and #19), flow cytometric analysis (burn patients #4, #5, #6, #11, #12) and analysis of culture fluids (burn patients #8, #9, #13, #14 and #15). PBMC were isolated from heparinized whole blood cells using Ficoll-Hypaque sedimentation [24,25]. Mature hematopoietic cells (T cells, B cells, NK cells, dendritic cells, monocytes and granulocytes) were magnetically depleted from the PBMC using a lineage cell depletion kit. Then, CD34<sup>+</sup> cells were sorted from these cells by a FACSARIA flow cytometer (Becton Dickinson) with FITC-conjugated anti-CD34 mAb. In some experiments, CD31<sup>+</sup> cells were further isolated from burn patient lineage<sup>-</sup>CD34<sup>+</sup> cell preparations by a FACSARIA cell sorter with PE-conjugated anti-human CD31 mAb.

### In vitro assays of lineage<sup>-</sup>CD34<sup>+</sup> cells

Lineage<sup>-</sup>CD34<sup>+</sup> cells were tested for their abilities to inhibit HBD-1 production by NHEK. Thus, NHEK (1×10<sup>5</sup> cells/ml, lower chamber) were cultured with lineage<sup>-</sup>CD34<sup>+</sup> cells (upper chamber) in a dual-chamber transwell (0.4 µm pore size, Costar,

Corning, NY, USA). Thirty-six hours after cultivation, the upper chamber was removed and NHEK in the lower chamber were cultured for an additional 36 hours. Culture fluids obtained were assayed for HBD-1 by ELISA, and cells obtained were analyzed for HBD-1 mRNA by semi-quantitative RT-PCR. Total RNA was extracted from these NHEK and turned back into cDNA through the reverse transcription of mRNA.  $\beta$ -actin was utilized as an internal control to normalize sample to sample variations in total RNA amounts. PCR was carried out using synthesized oligonucleotide primers: HBD-1, 5'-CCCAGTTCCCTGAAATCCTGA-3' (F) and 5'-CTTCTG GTCACCTCCAGCTC-3' (R). Using a thermal cycler, 35 cycles of PCR were performed at 94°C for 30 seconds, 61°C for 30 seconds, and 72°C for 30 seconds. The predicted products were run on 2% agarose gels containing ethidium bromide, and densitometric analysis was performed using a UVP Bioimaging System. To determine CD31 expression, lineage<sup>-</sup>CD34<sup>+</sup> cell preparations from burn patients and healthy donors were stained with PE-conjugated anti-human CD31 mAb. Fluorescence-positive cells were analyzed by FACS Canto (Becton-Dickinson) and FlowJo software.

### Preparation of lineage<sup>-</sup>CD34<sup>+</sup>CD31<sup>+</sup> cell-culture fluids and assay for their inhibitory activities on HBD production from NHEK

To determine the mechanism involved in the inhibitory activity of lineage<sup>-</sup>CD34<sup>+</sup>CD31<sup>+</sup> cells on HBD production from NHEK, lineage<sup>-</sup>CD34<sup>+</sup>CD31<sup>+</sup> cells ( $1 \times 10^6$  cells/ml) were cultured for 12 to 48 hours without any stimulation. As a control, lineage<sup>-</sup>CD34<sup>+</sup>CD31<sup>-</sup> cells derived from healthy donors were cultured under the same conditions. The culture fluids harvested were assayed for various cytokines and chemokines using ELISA. IL-4, IL-10, IL-12, IL-13, IL-17, IL-18, IL-23, IFN- $\gamma$ , CCL1, CCL2, CCL3, and CCL5 were included in the assay. The minimum detection limit for these cytokines and chemokines was 2–15 pg/ml. Next, the culture fluids of lineage<sup>-</sup>CD34<sup>+</sup>CD31<sup>+</sup> cells were treated with 2.5  $\mu$ g/ml of mAbs against soluble factors detected in the conditioned media for 1.5 hours at 4°C to determine the effector(s) for inhibiting HBD-1 production. As a control, the same culture fluids were treated with isotype Ab in the same fashion. Then, each culture fluid (20% v/v) was added to cultures of NHEK ( $1 \times 10^6$  cells/ml). In some experiments, NHEK were cultured with media supplemented with recombinant cytokines or chemokines detected in the culture fluids of lineage<sup>-</sup>CD34<sup>+</sup>CD31<sup>+</sup> cells. NHEK cultured with media alone served as a control. Culture fluids were harvested 36 hours after the cultivation and assayed for HBD-1 by ELISA. The minimum detection limit for HBD-1 was 4 pg/ml.

### Statistical analyses

Data are presented as mean  $\pm$  SEM. The results of the test group were compared to those of the control group using a Student's *t* test. If the *P*-value was less than 0.05, the result was considered to be significant.

## Results

### Lineage<sup>-</sup>CD34<sup>+</sup> cells from severely burned patients are inhibitory on HBD-1 production by NHEK

The effect of burn patient lineage<sup>-</sup>CD34<sup>+</sup> cell populations on  $\beta$ -defensin-1 (HBD-1) production and mRNA expression by NHEK was examined. All 20 burn patients enrolled in this study are listed in **Table 1**. In the first series of experiments, lineage<sup>-</sup>CD34<sup>+</sup> cells ( $1 \times 10^5$  cells/ml, upper chamber) were

isolated from PBMC of 5 healthy donors and 20 severely burned patients and transwell-cultured with NHEK ( $1 \times 10^5$  cells/ml, lower chamber) for 36 hours. After removal of the upper chamber, NHEK in the lower chamber were cultured for an additional 36 hours, and culture fluids harvested were assayed for HBD-1 by ELISA. In the results, 1.6 to 1.9 ng/ml of HBD-1 were produced by NHEK transwell-cultured with healthy donor lineage<sup>-</sup>CD34<sup>+</sup> cells. However, HBD-1 production by NHEK was suppressed by 62~94% when these cells were transwell-cultured with burn patient lineage<sup>-</sup>CD34<sup>+</sup> cells (**Fig. 1a**). Similar results were obtained when HBD-1 mRNA expression by NHEK harvested from the lower chamber of transwells was assayed by RT-PCR. As controls, HBD-1 mRNA was consistently expressed by NHEK transwell-cultured with #1~#5 healthy donor lineage<sup>-</sup>CD34<sup>+</sup> cells (**Fig. 1b**). However, HBD-1 mRNA was not expressed by NHEK transwell-cultured with lineage<sup>-</sup>CD34<sup>+</sup> cells derived from burn patients (**Fig. 1c**).

**CD31 is expressed by burn patient lineage<sup>-</sup>CD34<sup>+</sup> cells.** Lineage<sup>-</sup>CD34<sup>+</sup> cells were shown to be inhibitory on HBD-1 production by NHEK, while the peptide production by NHEK was not influenced by the same cell preparations derived from healthy donors. Therefore, peripheral blood lineage<sup>-</sup>CD34<sup>+</sup> cells isolated from severely burned patients and healthy donors were analyzed for CD31 surface antigen expression by flow cytometry. The expression of the CD31 surface antigen by CD4<sup>+</sup> suppressor cells and myeloid-derived suppressor cells has been demonstrated [26–28]. **Figs. 2a and 2b** show the results of flow cytometric assay with CD34 and CD31 double staining analyzed for all 5 healthy donors and 5 randomly selected burn patients (#4, #5, #6, #11 and #12). In the burn patient lineage<sup>-</sup>CD34<sup>+</sup> cell preparations, 60% or more were consistently shown to be CD31<sup>+</sup> cells. In contrast, only 0.2 to 8.2% in the healthy donor lineage<sup>-</sup>CD34<sup>+</sup> cell preparations were CD31<sup>+</sup> cells.

### Mechanisms involved in the suppressor cell activity of lineage<sup>-</sup>CD34<sup>+</sup>CD31<sup>+</sup> cells on HBD-1 production

As shown in **Fig. 1**, burn patient lineage<sup>-</sup>CD34<sup>+</sup> cells inhibited HBD-1 production by NHEK in transwell-cultures. This indicates that some soluble factors released from lineage<sup>-</sup>CD34<sup>+</sup>CD31<sup>+</sup> cells are involved in the inhibition of HBD-1 production by NHEK. Therefore, NHEK ( $1 \times 10^5$  cells/ml) were cultured in fresh medium (RPMI-1640/10% FBS) supplemented with various volumes (5–40%, v/v) of culture fluids of lineage<sup>-</sup>CD34<sup>+</sup>CD31<sup>+</sup> cells. The culture fluids were harvested from  $1 \times 10^6$  cells/ml of the cultures of burn patient lineage<sup>-</sup>CD34<sup>+</sup>CD31<sup>+</sup> cells 48 hours after cultivation. When 10% (v/v) of the culture fluids were added to NHEK cultures, 86% of the HBD-1 production was reduced. More than 96% inhibition was demonstrated when 20% (v/v) or more of the culture fluids were added to NHEK cultures (**Fig. 3a**). However, amounts of HBD-1 produced by NHEK were not influenced when these cells were cultured with 10 to 40% (v/v) of the culture fluids derived from cultures of healthy donor lineage<sup>-</sup>CD34<sup>+</sup>CD31<sup>-</sup> cells. From these results, the culture fluids of lineage<sup>-</sup>CD34<sup>+</sup>CD31<sup>+</sup> cells were shown to be inhibitory on HBD-1 production by NHEK.

To determine what soluble factors are present in the culture fluids of lineage<sup>-</sup>CD34<sup>+</sup>CD31<sup>+</sup> cells, the culture fluids of these cells were randomly assayed for IL-4, IL-10, IL-12, IL-13, IL-17, IL-18, IL-23, IFN- $\gamma$ , CCL1, CCL2, CCL3, and CCL5. As a result, IL-10, IL-13, and CCL2 were detected in the culture fluids of lineage<sup>-</sup>CD34<sup>+</sup>CD31<sup>+</sup> cells. Other soluble mediators were not demonstrated in the culture fluids of these cells. The time course of the production of IL-10, IL-13, and CCL2 is shown in **Figs. 3b–3d**. Lineage<sup>-</sup>CD34<sup>+</sup>CD31<sup>-</sup> cells derived from peripheral blood of

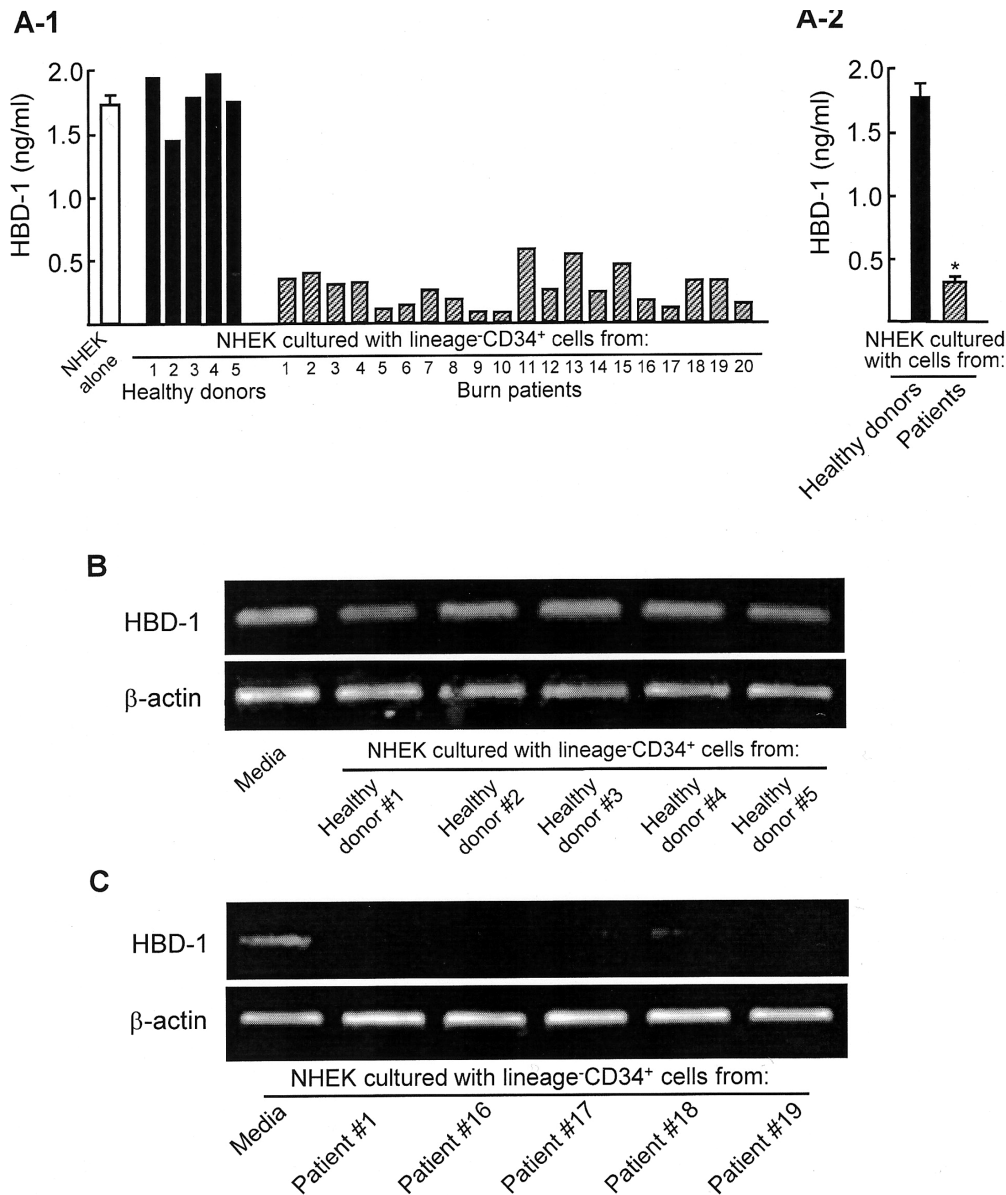

**Figure 1. HBD-1 production and mRNA expression by NHEK cultured with peripheral blood lineage<sup>-</sup>CD34<sup>+</sup> cells that were isolated from both severely burned patients and healthy donors.** **A.** HBD-1 production. Lineage<sup>-</sup>CD34<sup>+</sup> cells ( $1 \times 10^5$  cells/ml, upper chamber), isolated from 5 healthy donors (#1~#5) and 20 burn patients (#1~#20), were transwell-cultured with NHEK ( $1 \times 10^5$  cells/ml, lower chamber) for 36 hours. After removal of the upper chamber, NHEK in the lower chamber were cultured for an additional 36 hours. Culture fluids obtained were assayed for HBD-1 by ELISA. Fig. 1A-1 shows independent experiments performed using blood specimens from 5 healthy donors and 20 burn patients, and Fig. 1A-2 shows mean  $\pm$  SEM of the results shown in Fig. 1A-1. \*  $P < 0.001$  vs control. **B and C.** HBD-1 mRNA expression. Lineage<sup>-</sup>CD34<sup>+</sup> cells ( $1 \times 10^5$  cells/ml, upper chamber), isolated from peripheral blood of 5 healthy donors (#1~#5, **B**) and 5 severely burn patients (#1, #16, #17, #18, #19, **C**), were transwell-cultured with NHEK ( $1 \times 10^5$  cells/ml, lower chamber) for 36 hours. After removal of the upper chamber, NHEK in the lower chamber were analyzed for HBD-1 mRNA by RT-PCR. doi:10.1371/journal.pone.0082926.g001

healthy donors did not produce IL-10, IL-13, or CCL2 (Figs. 3b–3d).

Next, the role of IL-10, IL-13, and CCL2 on the lineage<sup>-</sup>CD34<sup>+</sup>CD31<sup>+</sup> cell-associated suppression of HBD-1 production by NHEK was examined. The culture fluids of lineage<sup>-</sup>CD34<sup>+</sup>CD31<sup>+</sup> cells were treated with a mAb directed against IL-10, IL-13, and CCL2, or a mixture of these mAbs. Then, these culture fluids were assayed for their inhibitory activities on the peptide production by NHEK. When NHEK were cultured with the lineage<sup>-</sup>CD34<sup>+</sup>CD31<sup>+</sup> cell-conditioned media that were

previously treated for 1.5 hours at 4°C with anti-IL-10 or anti-CCL2 mAb, HBD-1 production was recovered by 33 to 48%. The complete recovery of the HBD-1 production was shown when lineage<sup>-</sup>CD34<sup>+</sup>CD31<sup>+</sup> cell-conditioned media previously treated with a mixture of mAbs for IL-10 and CCL2 were added to NHEK cultures (**Fig. 4a**). HBD-1 production by NHEK was not influenced significantly (5% recovery) when NHEK were cultured with the conditioned media treated with anti-IL-13 mAb. Any synergistic effects between IL-13 and IL-10 or IL-13 and CCL2 were not demonstrated. These results indicate that IL-10 and

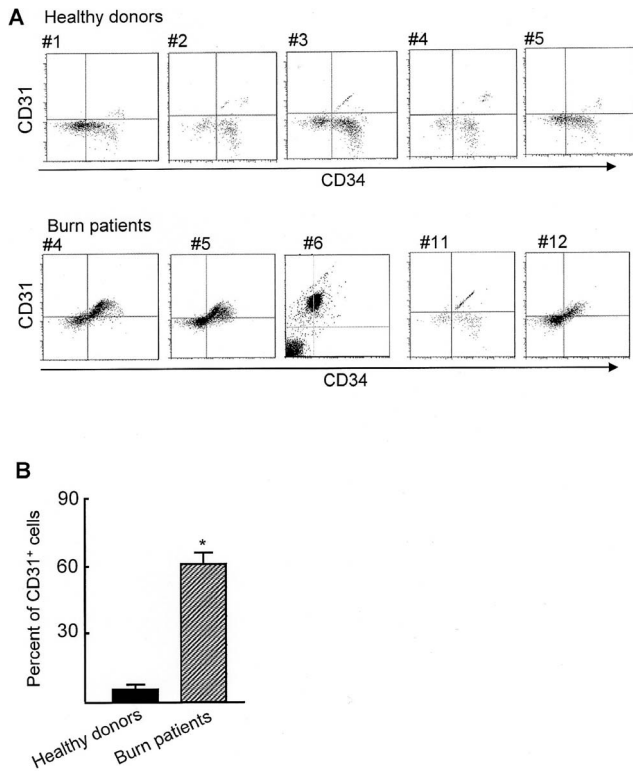

**Figure 2. CD31<sup>+</sup> cells detected in burn patient peripheral blood lineage<sup>-</sup>CD34<sup>+</sup> cells.** Lineage<sup>-</sup>CD34<sup>+</sup> cells from healthy donors and burn patients were analyzed for CD31 expression by flow cytometry. Fig. 2A shows independent experiments performed using blood specimens from 5 healthy donors and 5 burn patients (#4, #5, #6, #11, and #12), and Fig. 2B shows mean ± SEM of the results shown in Fig. 2A. \* *P*<0.001 vs control. doi:10.1371/journal.pone.0082926.g002

CCL2 are effector molecules of lineage<sup>-</sup>CD34<sup>+</sup>CD31<sup>+</sup> cells for their inhibitory activities on HBD-1 production by NHEK. In fact, a mixture of rIL-10 and rCCL2 completely suppressed HBD-1 production by NHEK (Fig. 4b).

**Discussion**

HBDs are important effector molecules in the antibacterial innate immunities against dermal infections [10–13]. However, expressions of HBD-1 and HBD-2 mRNAs are greatly reduced in tissues surrounding the full-thickness burn wounds [14–16]. In the present study, lineage<sup>-</sup>CD34<sup>+</sup> cells isolated from the peripheral blood of severely burned patients were shown to be inhibitory on HBD-1 production by normal human epidermal keratinocytes (NHEK), while the same lineage<sup>-</sup>CD34<sup>+</sup> cells from healthy donor peripheral blood did not inhibit the peptide production by NHEK. Suppressor cells in burn patient peripheral blood were characterized as lineage<sup>-</sup>CD34<sup>+</sup>CD31<sup>+</sup> cells, while healthy donors were shown to be a carrier of lineage<sup>-</sup>CD34<sup>+</sup>CD31<sup>-</sup> cells. The expression of the CD31 surface antigen by human CD4<sup>+</sup> suppressor cells has been demonstrated [26]. Murine myeloid-derived suppressor cells have been reported as cells expressing Gr-1, CD11, and CD31 surface antigens [27,28]. These reports support our findings that lineage<sup>-</sup>CD34<sup>+</sup>CD31<sup>+</sup> cells demonstrated in the burn patient peripheral blood are suppressor cells for HBD production by NHEK. In our preliminary studies,  $\gamma$ -irradiated NOD-SCID IL-2 $\gamma$ <sup>-/-</sup> mice resisted skin infection with

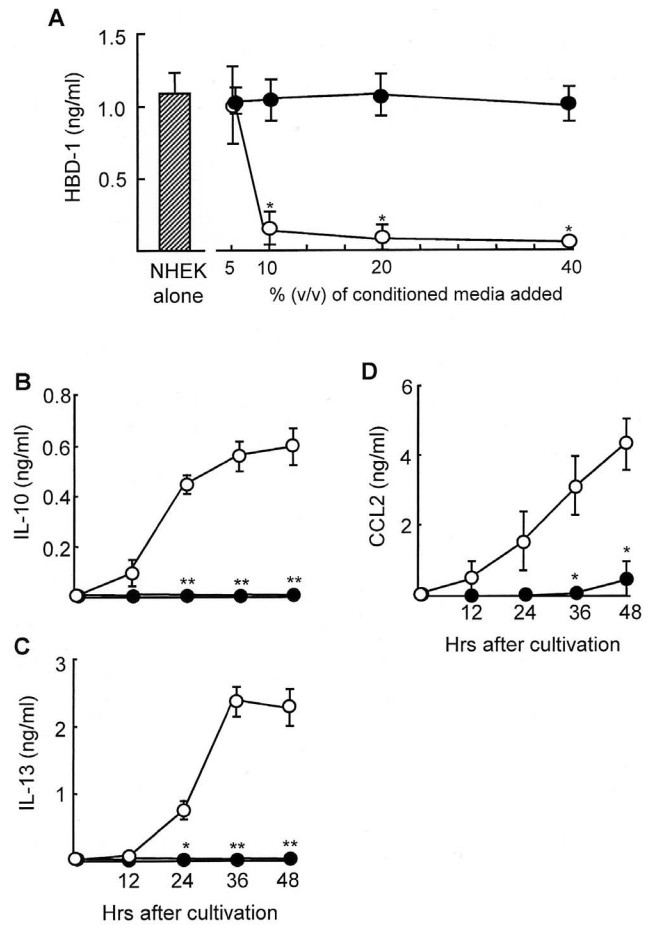

**Figure 3. Culture fluids of lineage<sup>-</sup>CD34<sup>+</sup>CD31<sup>+</sup> cells are inhibitory on HBD-1 production by NHEK.** A. Inhibition of HBD production in NHEK cultures supplemented with culture fluids of lineage<sup>-</sup>CD34<sup>+</sup>CD31<sup>+</sup> cells. Culture fluids were harvested 48 hours after cultivation of lineage<sup>-</sup>CD34<sup>+</sup>CD31<sup>+</sup> cells (1×10<sup>6</sup> cells/ml) derived from burn patients #8, #9, #13, #14 and #15 (open circles). The culture fluids of lineage<sup>-</sup>CD34<sup>+</sup>CD31<sup>-</sup> cells of healthy donors #1~#5 (filled circles) were utilized as a control. Five to 40% (v/v) of these culture fluids were added to cultures of NHEK (1×10<sup>5</sup> cells/ml). Culture fluids harvested from NHEK cultures were assayed for HBD-1 by ELISA. \* *P*<0.01 vs control. B–D. Production of IL-10, IL-13 and CCL2 by lineage<sup>-</sup>CD34<sup>+</sup>CD31<sup>+</sup> cells. Lineage<sup>-</sup>CD34<sup>+</sup>CD31<sup>+</sup> cells (1×10<sup>5</sup> cells/ml, open circles) isolated from peripheral blood of burn patients #8, #9, #13, #14 and #15 were cultured for 12 to 48 hours. As controls, peripheral blood lineage<sup>-</sup>CD34<sup>+</sup>CD31<sup>-</sup> cells of healthy donors #1~#5 (filled circles) were cultured under the same conditions. Supernatants obtained were assayed for IL-10 (B), IL-13 (C) and CCL2 (D) by ELISA. \* *P*<0.05, \*\* *P*<0.01 vs lineage<sup>-</sup>CD34<sup>+</sup>CD31<sup>-</sup> cells. doi:10.1371/journal.pone.0082926.g003

10<sup>3</sup> CFU/mouse of *P. aeruginosa*. *P. aeruginosa* at a dose of 10<sup>5</sup> CFU/mouse was shown to be 1 LD<sub>50</sub> in  $\gamma$ -irradiated NOD-SCID IL-2 $\gamma$ <sup>-/-</sup> mice. These mice are deficient for functional T cells, B cells, NK cells, macrophages, and neutrophils [29–31], indicating antimicrobial peptides released from non-immunocompetent cells play a role in the protection from sepsis stemming from *P. aeruginosa* skin infections. On the other hand, the same mice treated with anti-mouse skin AMP rabbit IgG died quickly after 10<sup>5</sup> CFU/mouse of *P. aeruginosa* skin infection. Less than 10 CFU/mouse of *P. aeruginosa* was shown to be 1 LD<sub>50</sub> in  $\gamma$ -irradiated NOD-SCID IL-2 $\gamma$ <sup>-/-</sup> mice treated with the IgG. MBD-1, MBD-2, and MBD-3 (typical murine antimicrobial peptides in skin) were not detected in skin homogenates of  $\gamma$ -irradiated

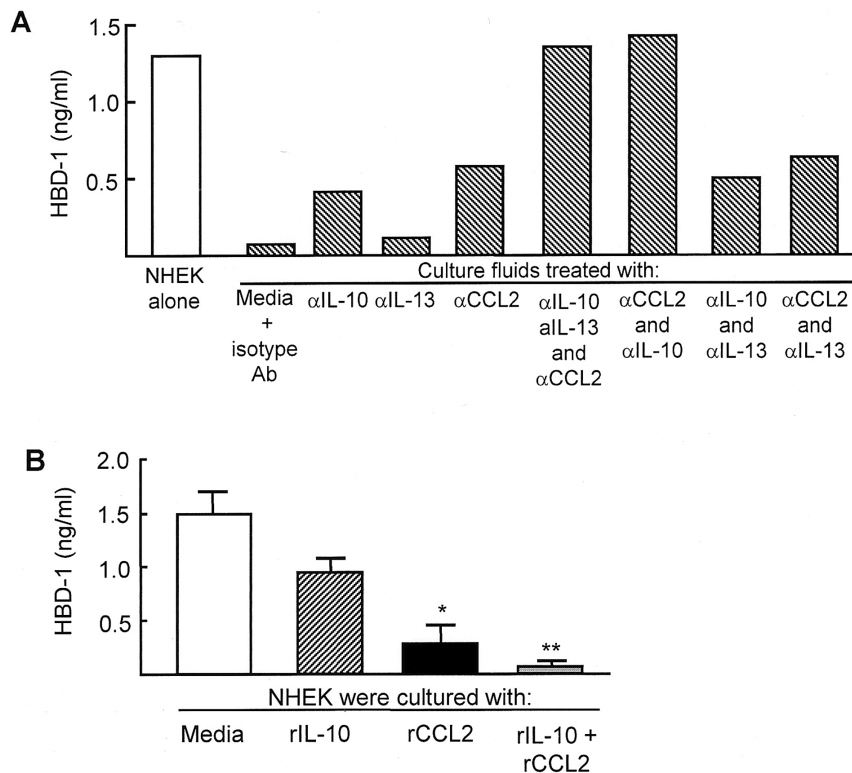

**Figure 4. CCL2 and IL-10 produced by burn patient lineage<sup>-</sup>CD34<sup>+</sup>CD31<sup>+</sup> cells are responsible for their suppressor cell activities on HBD-1 production by NHEK.** **A.** Effect of mAbs against IL-10, CCL2 and IL-13 on the suppressor activities of lineage<sup>-</sup>CD34<sup>+</sup>CD31<sup>+</sup> cell-culture fluids on HBD production by NHEK. NHEK ( $1 \times 10^5$  cells/ml) were cultured with fresh media supplemented with 20% (v/v) of the culture fluids that were previously treated with mAb for IL-10, IL-13 and CCL2 (2.5  $\mu$ g/ml each) or a combination of these mAbs. Forty-eight hours after cultivation, culture fluids harvested were assayed for HBD-1. Figure 4A displays one of the representative results shown in independent experiments using culture fluids of 5 different lineage<sup>-</sup>CD34<sup>+</sup>CD31<sup>+</sup> cell preparations derived from burn patients #8, #9, #13, #14 and #15. **B.** Effect of rIL-10 and rCCL2 on HBD-1 production by NHEK. NHEK ( $1 \times 10^5$  cells/ml) were treated with rIL-10 (1 ng/ml), rCCL2 (10 ng/ml) or a combination of rIL-10 and rCCL2. Culture fluids obtained 24 hours after treatment were assayed for HBD-1. \*  $P < 0.01$ , \*\*  $P < 0.001$  vs NHEK cultured with media. doi:10.1371/journal.pone.0082926.g004

NOD-SCID IL-2 $\gamma$ <sup>-/-</sup> mice treated with the IgG. This indicates that skin antimicrobial peptides play an important role in the host's antibacterial innate immunities against *P. aeruginosa* skin infections. This suggests that the host's antibacterial defense against sepsis stemming from pseudomonal burn wound infections is impaired by lineage<sup>-</sup>CD34<sup>+</sup>CD31<sup>+</sup> cells that appear in association with burn injuries.

Lineage<sup>-</sup>CD34<sup>+</sup>CD31<sup>+</sup> cells inhibited HBD-1 production by NHEK in dual-chamber transwells. This indicates that cell-to-cell contact between lineage<sup>-</sup>CD34<sup>+</sup>CD31<sup>+</sup> cells and NHEK was not required for inhibiting HBD-1 production from NHEK. Therefore, we examined the role of soluble factors released from lineage<sup>-</sup>CD34<sup>+</sup>CD31<sup>+</sup> cells on inhibiting HBD-1 production from NHEK. In the first series of experiments, various cytokines and chemokines in the cultures of lineage<sup>-</sup>CD34<sup>+</sup>CD31<sup>+</sup> cells were randomly assayed. In the results, IL-10, CCL2, and IL-13 were detected in the culture fluids of lineage<sup>-</sup>CD34<sup>+</sup>CD31<sup>+</sup> cells. Other soluble factors were not detected in the culture fluids of these cells. IL-13 has been shown to be involved in HBD-3 deficiency in atopic dermatitis [32–34]. Expressions of HBD-2 and LL37 by keratinocytes were shown to be down-regulated by IL-10 and/or IL-13 [33]. Also, the importance of IL-4 on inhibiting HBD production has been substantiated [35]; however, IL-4 was not detected in these culture fluids. None of the above cytokines and chemokines were produced by healthy donor lineage<sup>-</sup>CD34<sup>+</sup>CD31<sup>-</sup> cells, which were not inhibitory on HBD-1

production from NHEK. In the next series of experiments, the effects of CCL2, IL-10, and IL-13 released from the lineage<sup>-</sup>CD34<sup>+</sup>CD31<sup>+</sup> cells on the suppression for HBD-1 production by NHEK were examined. When NHEK were cultured with fresh media supplemented with 20% (v/v) of culture fluids of lineage<sup>-</sup>CD34<sup>+</sup>CD31<sup>+</sup> cells, HBD-1 production in these cultures was not demonstrated. However, the antimicrobial peptide was produced in NHEK cultures supplemented with lineage<sup>-</sup>CD34<sup>+</sup>CD31<sup>+</sup> cell-culture fluids that were previously treated with a mixture of mAbs for IL-10 and CCL2. The suppressor activity of lineage<sup>-</sup>CD34<sup>+</sup>CD31<sup>+</sup> cell-culture fluids on the peptide production by NHEK was not influenced by anti-IL-13 mAb. These results indicate that IL-10 and CCL2 released from lineage<sup>-</sup>CD34<sup>+</sup>CD31<sup>+</sup> cells are effectors on the suppression of the peptide production by NHEK. This was confirmed in NHEK cultures supplemented with rIL-10 and/or rCCL2. In the results obtained, HBD-1 production by NHEK was completely inhibited by a mixture of rCCL2 and rIL-10. This indicates that lineage<sup>-</sup>CD34<sup>+</sup>CD31<sup>+</sup> cells that appear in association with severe burn injuries are inhibitor cells on HBD-1 production by NHEK. Thus, IL-10 and CCL2 released from lineage<sup>-</sup>CD34<sup>+</sup>CD31<sup>+</sup> cells are shown to be effectors on their suppressor cell activities.

We have previously reported that immunosuppressive neutrophils (named as PMN-II) are predominantly present in peripheral blood of severely burned patients [24]. Similar to lineage<sup>-</sup>CD34<sup>+</sup>CD31<sup>+</sup> cells, PMN-II possess the ability to produce CCL2

and IL-10 [24,36]. These PMN-II that appear in association with severe burn injuries play an important role on the decreased resistance of burn patients to MRSA [36] and *Enterococcus faecalis* infections [37–39]. M2 macrophages generated from resident macrophages after stimulation with CCL2 and IL-10 inactivate the host's antibacterial resistance [24,36]. Thus, M2 macrophages possess minimal bactericidal activities and inhibit macrophage conversion from resident macrophages to M1 macrophages, which are major effector cells against MRSA and enterococcal infections [36–39]. Through the production of IL-10 and CCL2, lineage<sup>-</sup>CD34<sup>+</sup>CD31<sup>+</sup> cells may also be involved in the macrophage conversion from resident macrophages to M2 macrophages.

All severely burned patients, hospitalized at Shriners Hospitals for Children in Galveston, routinely received the standard burn care treatments (physical debridement, irrigation, resuscitation, systemic and topical antibiotic treatment, and aggressive nutrition support). Although some of the blood specimens utilized in this study were obtained from the patients under standard burn care treatments, we do not know how lineage<sup>-</sup>CD34<sup>+</sup>CD31<sup>+</sup> cell generation is influenced by these treatments. In murine studies, we have previously described the generation of Gr-1<sup>+</sup>CD11b<sup>+</sup> immature myeloid cells that are corresponding to human lineage<sup>-</sup>CD34<sup>+</sup>CD31<sup>+</sup> cells [16]. As preliminary studies of these experiments, normal BALB/c mice were exposed to standard burn care treatments (resuscitation, systemic antibiotic treatment and aggressive nutrition support). However, Gr-1<sup>+</sup>CD11b<sup>+</sup> immature myeloid cells were not isolated from neither the circulation or

spleens of these mice. Also, we have isolated Gr-1<sup>+</sup>CD11b<sup>+</sup> immature myeloid cells from severely burned mice (3<sup>rd</sup> degree, 30% TBSA burns, 1 to 6 days postburn) [16,18]. Therefore, now we are thinking that burn injury is the most important factor on the generation of lineage<sup>-</sup>CD34<sup>+</sup>CD31<sup>+</sup> cells in severely burned patients.

In host antibacterial innate immunities, the importance of  $\beta$ -defensins against bacterial invasions has been well-described [7,8]. We have demonstrated the deficit of these peptides in tissues surrounding the burn area. Therefore, only 50 CFU/mouse of *Pseudomonas aeruginosa* burn wound infection causes severe systemic infections related to death [18]. The advance of the present study was to determine factors responsible for inhibiting  $\beta$ -defensin production by skin keratinocytes in severely burned patients. CCL2 and IL-10 released from lineage<sup>-</sup>CD34<sup>+</sup>CD31<sup>+</sup> cells were shown to be key factors for inhibiting  $\beta$ -defensin production by keratinocytes. Further studies on the correlation between the appearance of these cells and clinical outcomes, sepsis, infections and death of burn patients are required.

## Author Contributions

Conceived and designed the experiments: SY MK FS. Performed the experiments: SY JOL KN. Analyzed the data: SY SS FS. Contributed reagents/materials/analysis tools: JOL DNH. Wrote the paper: SY MK FS.

## References

- Morrison VA (2001) Infections in the immunocompromised host. In: Management of Antimicrobials in Infectious Diseases (Mainous III AG and Pomeroy C eds), Humana Press, NJ, p. 315–330.
- Hunsicker LM, Heggors JP, Patel JA (2001) Infections in burn patients. In: Clinical Management of Infections in Immunocompromised Infants and Children (Patrick CC ed), Lippincott Williams & Wilkins, Philadelphia, p. 327–349.
- Davey V (2002) Immunocompromised persons and emerging infectious diseases. In: Emerging Infectious Diseases (Lashley FR and Durham JD eds), Springer Publishing Co., NY, p. 303–324.
- Church D, Elsayed S, Reid O, Winston B, Lindsay R (2006) Burn wound infections. Clin Microbiol Rev 19: 403–434.
- Heggors JP, Hawkins H, Edgar P, Villarreal C, Herndon DN (2002) Treatment of infection in burns. In: Total Burn Care (Herndon DN ed), Saunders, Edinburgh, p. 120–169.
- Stuertze DD, Holder IA (1975) Experimental studies of the pathogenesis of infections due to *Pseudomonas aeruginosa*: description of a burned mouse model. J Infect Dis 131: 688–691.
- Harder J, Bartels J, Christophers E, Schroeder JM (1997) A peptide antibiotic from human skin. Nature 387: 861–862.
- Lehrer RI, Lichtenstein AK, Ganz T (1993) Defensins: antimicrobial and cytotoxic peptides of mammalian cells. Annu Rev Immunol 11: 105–128.
- Ganz T, Lehrer RI (2003) Antimicrobial Peptide. In: Innate Immunity (Ezekowitz RAB, Hoffmann JA Eds), Humana Press, Inc., NJ, p. 287–303.
- Moser C, Weiner DJ, Lysenko E, Bals R, Weiser JN, et al. (2002)  $\beta$ -Defensin 1 contributes to pulmonary innate immunity in mice. Infect Immun 70: 3068–3072.
- Sawamura D, Goto M, Shibaki A, Akiyama M, McMillan JR, et al. (2005) Beta defensin-3 engineered epidermis shows highly protective effect for bacterial infection. Gene Ther 12: 857–861.
- Braff MH, Gallo RL (2006) Antimicrobial peptides: an essential component of the skin defensive barrier. Curr Top Microbiol Immunol 306: 91–110.
- Nizet V, Ohtake T, Lauth X, Trowbridge J, Rudisill J, et al. (2001) Innate antimicrobial peptide protects the skin from invasive bacterial infection. Nature 414: 454–457.
- Milner SM, Ortega MR (1999) Reduced antimicrobial peptide expression in human burn wounds. Burns 25: 411–413.
- Ortega MR, Ganz T, Milner SM (2000) Human beta defensin is absent in burn blister fluid. Burns 26: 724–726.
- Kobayashi M, Yoshida T, Takeuchi D, Jones VC, Shigematsu K, et al. (2008) Gr-1<sup>+</sup>CD11b<sup>+</sup> cells as an accelerator of sepsis stemming from *Pseudomonas aeruginosa* wound infection in thermally injured mice. J Leukoc Biol 83: 1354–1362.
- Yoshida S, Inatsu A, Kobayashi M, Herndon DN, Suzuki F (2010) CD34<sup>+</sup>CD31<sup>+</sup> immature myeloid cells as an inhibitor cell on the production of antimicrobial peptide. J Immunol 184: 89–90.
- Yoshida T, Yoshida S, Kobayashi M, Herndon DN, Suzuki F (2010) Glycyrrhizin restores the impaired production of  $\beta$ -defensin in tissues surrounding the burn area and improves the resistance of burn mice to *Pseudomonas aeruginosa* wound infection. J Leukoc Biol 87: 35–41.
- Geissmann F, Auffray C, Palframan R, Wrigg C, Ciocca A, et al. (2008) Blood monocytes: distinct subsets, how they relate to dendritic cells, and their possible roles in the regulation of T-cell responses. Immunol Cell Biol 86: 398–408.
- Ben-Baruch A (2006) Inflammation-associated immune suppression in cancer: the roles played by cytokines, chemokines and additional mediators. Semin Cancer Biol 16: 38–52.
- Baniyash M (2006) Chronic inflammation, immunosuppression and cancer: new insights and outlook. Semin Cancer Biol 16: 80–88.
- Kusmartsev S, Gabrilovich DI (2006) Role of immature myeloid cells in mechanisms of immune evasion in cancer. Cancer Immunol Immunother 55: 237–245.
- Herndon DN (2007) In: Total Burn Care 3rd Edition. Saunders Elsevier.
- Kobayashi M, Jeschke GM, Shigematsu K, Asai A, Yoshida S, et al. (2010) M2b monocytes predominated in peripheral blood of severely burned patients. J Immunol 185: 7174–7179.
- Inatsu A, Jeschke MG, Asai A, Kobayashi M, Herndon DN, et al. (2011) Lack of Th17 cell generation in patients with severe burn injuries. J Immunol 187: 2155–2161.
- Torimoto Y, Rothstein DM, Dang NH, Schlossman SF, Morimoto C (1992) CD31, a novel cell surface marker for CD4 cells of suppressor lineage, unaltered by state of activation. J Immunol 148: 388–396.
- Bronte V, Apolloni E, Cabrelle A, Ronca R, Serafini P, et al. (2000) Identification of a CD11b<sup>+</sup>Gr-1<sup>+</sup>CD31<sup>+</sup> myeloid progenitor capable of activating or suppressing CD8<sup>+</sup> T cells. Blood 96: 3838–3846.
- Brudecki L, Ferguson DA, McCall CE, El Gazzar M (2012) Myeloid-derived suppressor cells evolve during sepsis and can enhance or attenuate the systemic inflammatory response. Infect Immun 80: 2026–2034.
- Piganelli JD, Martin T, Haskins K (1998) Splenic macrophages from the NOD mouse are defective in the ability to present antigen. Diabetes 47: 1212–1218.
- O'Brien BA, Huang Y, Geng X, Dutz JP, Finegood DT (2002) Phagocytosis of apoptotic cells by macrophages from NOD mice is reduced. Diabetes 51: 2481–2488.
- Marée AF, Komba M, Finegood DT, Edelstein-Keshet L (2008) A quantitative comparison of rates of phagocytosis and digestion of apoptotic cells by macrophages from normal (BALB/c) and diabetes-prone (NOD) mice. J Appl Physiol 104: 157–169.
- Albanesi C, Fairchild HR, Madonna S, Scarponi C, De Pità O, et al. (2007) IL-4 and IL-13 negatively regulate TNF-alpha- and IFN-gamma-induced beta-

- defensin expression through STAT-6, suppressor of cytokine signaling (SOCS)-1, and SOCS-3. *J Immunol* 179: 984–992.
33. Howell MD, Novak N, Bieber T, Pastore S, Girolomoni G, et al. (2005) Interleukin-10 downregulates anti-microbial peptide expression in atopic dermatitis. *J Invest Dermatol* 125: 738–745.
  34. Howell MD, Boguniewicz M, Pastore S, Novak N, Bieber T, et al. (2006) Mechanism of HBD-3 deficiency in atopic dermatitis. *Clin Immunol* 121: 332–338.
  35. Nomura I, Goleva E, Howell MD, Hamid QA, Ong PY, et al. (2003) Cytokine milieu of atopic dermatitis, as compared to psoriasis, skin prevents induction of innate immune response genes. *J Immunol* 171: 3262–3269.
  36. Tsuda Y, Takahashi H, Kobayashi M, Hanafusa T, Herndon DN, et al. (2004) Three different neutrophil subsets exhibited in mice with different susceptibilities to infection by methicillin-resistant *Staphylococcus aureus*. *Immunity* 21: 215–226.
  37. Tsuda Y, Shigematsu K, Kobayashi M, Herndon DN, Suzuki F (2008) Role of polymorphonuclear neutrophils on infectious complications stemming from *Enterococcus faecalis* oral infection in thermally injured mice. *J Immunol* 180: 4133–4138.
  38. Shigematsu K, Asai A, Kobayashi M, Herndon DN, Suzuki F (2009) *Enterococcus faecalis* translocation in mice with severe burn injury: a pathogenic role of CCL2 and alternatively activated macrophages (M2aM $\phi$  and M2cM $\phi$ ). *J Leukoc Biol* 86: 999–1005.
  39. Shigematsu K, Kogiso M, Kobayashi M, Herndon DN, Suzuki F (2012) Effect of CCL2 antisense oligodeoxynucleotides on bacterial translocation and subsequent sepsis in severely burned mice orally infected with *Enterococcus faecalis*. *Eur J Immunol* 42: 158–164.
